# Cortical neuronal differentiation is not impaired by elevated levels of $\alpha$ -synuclein in human pluripotent stem cells

Ammar Natalwala,<sup>1,2,3,\*</sup> Ranya Behbehani,<sup>3</sup> Ratsuda Yapom,<sup>3</sup> Tilo Kunath<sup>3,\*</sup>

## Affiliations

1. UCL Queen Square Institute of Neurology, Department of Neuromuscular Diseases, Queen Square House, London, WC1N3BG
2. Victor Horsley Department of Neurosurgery, National Hospital for Neurology & Neurosurgery Queen Square, London, WC1N 3BG
3. Centre for Regenerative Medicine, Institute for Regeneration and Repair, School of Biological Sciences, The University of Edinburgh, Edinburgh BioQuarter, 5 Little France Drive, Edinburgh, EH16 4UU

## \* Corresponding authors

Mr Ammar Natalwala *BSc(Hons), MBChB, MRCS (Eng), PhD*

NIHR Clinical Lecturer in Neurosurgery

Tel: +44(0)20 7679 2000

Email: a.natalwala@ucl.ac.uk

Tilo Kunath *PhD*

Email: tilo.kunath@ed.ac.uk

## Keywords

Human pluripotent stem cells,  $\alpha$ -synuclein, synucleinopathy, cellular differentiation, neurogenesis, transcriptomics, Parkinson's disease, dementia with Lewy bodies, *in vitro* disease models

## Conflicts of interest

The authors have declared no competing interests.

## Funding

AN was funded by the Wellcome Trust Research Training Fellowship (203646/Z/16/Z). TK was funded by an MRC grant (MR/J012831/1).

## Abstract

$\alpha$ -Synuclein ( $\alpha$ Syn) is a small, disordered protein that becomes aggregated in Lewy body diseases, such as Parkinson's disease (PD) and dementia with Lewy bodies (DLB). Human induced pluripotent stem cells (hiPSCs) potentially provide a tractable disease model to monitor early molecular changes associated with PD/DLB. We and others have previously derived hiPSC lines from patients with duplication and triplication of the *SNCA* gene, encoding for  $\alpha$ Syn. Also,  $\alpha$ Syn over-expression systems have been established in human embryonic stem cell (hESC) lines. A critical unresolved question is whether these pluripotent stem cell lines, with elevated levels of  $\alpha$ Syn, can undergo efficient differentiation into dopaminergic and cortical neurons to model PD and DLB, respectively. It remains unclear if increased expression of  $\alpha$ Syn affects hiPSC/hESC neural induction and neuronal differentiation. Therefore, we generated an allelic series of  $\alpha$ Syn over-expressing hESC lines and characterised their potential for neurogenesis. Clonal hESC lines with significantly different levels of  $\alpha$ Syn expression proliferated normally and maintained expression of pluripotent markers, such as OCT4. All cell lines efficiently produced PAX6<sup>+</sup> neuroectoderm and there was no correlation between  $\alpha$ Syn expression and neural induction efficiency. Finally, global transcriptomic analysis of cortical differentiation of hESC lines with low or high levels of  $\alpha$ Syn expression demonstrated robust and similar induction of cortical neuronal expression profiles. Gene expression differences observed were unrelated to neural induction and neuronal differentiation. We conclude that elevated expression of  $\alpha$ Syn in human pluripotent stem cells does not adversely affect their neuronal differentiation potential and this opens opportunities to model synucleinopathies including DLB.

## Introduction

Multiple lines of evidence have implicated  $\alpha$ Syn as a major pathological driver in PD (Chartier-Harlin et al., 2004; Polymeropoulos et al., 1997; Singleton et al., 2003; Spillantini et al., 1997). The genetic forms of PD have led to the development of patient-derived and engineered pluripotent stem cell-derived models to gain mechanistic insights into synucleinopathies (Singh Dolt et al., 2017). A key question for the validity of such models is whether mutant or elevated  $\alpha$ Syn expression disrupts early neural induction or neuronal differentiation, thereby limiting later phenotypic analysis and disease modelling. Current data in the literature is conflicting, with some studies proposing that high levels of  $\alpha$ Syn alter cell fate and differentiation (Oliveira et al., 2015; Schneider et al., 2007), whereas others have found no evidence for impaired neurogenesis (Brazdis et al., 2020; Devine et al., 2011; Prots et al., 2018). In this study, we aim to systematically investigate if elevated  $\alpha$ Syn expression affects cortical neuron differentiation using two robust cortical neuron differentiation protocols, and multiple clones of isogenic hESC lines over-expressing  $\alpha$ Syn. If either the efficiency of stem cell neurogenesis or fidelity of neuronal differentiation is affected, then this may be a source of bias in studies comparing cultured neurons with differential  $\alpha$ Syn expression. Isogenic cellular models provide the best experimental system to test this directly.

Studies utilising  $\alpha$ Syn null mouse models showed no major differences in neuronal development and overall brain structure (Abeliovich et al., 2000; Greten-Harrison et al., 2010; Specht and Schoepfer, 2001). However, subtle differences in dopaminergic neurotransmission were reported and these were age-dependent (Al-Wandi et al., 2010; Anwar et al., 2011; Connor-Robson et al., 2016). Rodent models employing transgenic over-expression of wild-type  $\alpha$ Syn have reported impaired adult neurogenesis, but have not determined whether this is a neurodevelopmental defect from birth or a toxic effect of  $\alpha$ Syn over-expression (Winner et al., 2012). We have previously shown that hiPSCs with an *SNCA* triplication mutation have a two-fold increase in  $\alpha$ Syn protein levels, and this did not significantly impair dopaminergic neuronal differentiation (Devine et al., 2011). This was also shown by other independent groups using hiPSCs harbouring the *SNCA* triplication (Byers et al., 2011; Lin et al., 2016) and *SNCA* duplication mutations (Brazdis et al., 2020; Prots et al., 2018). However, other studies using *SNCA* triplication mutation-derived hiPSCs reported reduced neuronal differentiation capacity and impaired neurite outgrowth (Flierl et al., 2014; Oliveira et al., 2015). Furthermore, other studies using lentiviral-mediated Dox-inducible expression of  $\alpha$ Syn, in human iPSC-derived neuronal progenitors, reported altered cell fate and impaired differentiation of neural stem cells into neurons (Schneider et al., 2007; Zasso et al., 2018). The cellular and rodent data described so far suggests conflicting roles for  $\alpha$ Syn in neurogenesis, highlighting the need for work to clarify this point.

In this study, we set out to determine whether elevated  $\alpha$ Syn expression impairs cortical neuron differentiation of human pluripotent stem cells. We generated an allelic series of clonal isogenic hESC lines expressing a broad range of  $\alpha$ Syn, including lines expressing the protein at supraphysiological levels. We show, using marker analysis during multiple rounds of differentiation and unbiased transcriptomic analysis, that cortical neuron differentiation is not impaired by increased expression of  $\alpha$ Syn. The strength of our approach is the use of a human model system incorporating sustained elevated  $\alpha$ Syn expression during differentiation, robust cortical neuron differentiation protocols and unbiased analysis of the transcriptome before and after differentiation in a collection of isogenic cell lines. This study provides important evidence for the validity of hESC/iPSC cellular disease models with elevated levels of  $\alpha$ Syn expression.

## Results

### *Elevated $\alpha$ Syn expression in hESC lines is compatible with cortical neuronal differentiation*

An allelic series of clonal transgenic hESC lines were constructed using a human *SNCA* cDNA expression cassette driven by the pCAG promoter (Figure 1A), reported to maintain stable and ubiquitous transgene expression across diverse cell types (Hitoshi et al., 1991; Liew et al., 2007). Multiple puromycin-resistant clones were established on a Shef4 parental hESC line and examined for *SNCA* expression using qRT-PCR (Figure 1B). V2 and V39 control lines, transfected with a control plasmid lacking *SNCA*, expressed similar levels of *SNCA* to the parental cell line, Shef4. In an undifferentiated state, 10 clones, including S9 and S34, had similar *SNCA* expression to Shef4, whereas 19 clones, including S8 and S37 had elevated expression of *SNCA* (2-fold to 30-fold) relative to the parental cell line. Clones were selected based on *SNCA* mRNA expression and placed into low (Shef4, S9, S34) and high (S8, S37) groups. Each of these lines similarly expressed the pluripotency marker, OCT4, and maintained hESC morphology in their undifferentiated state (Figure 1C). Elevated expression of  $\alpha$ Syn protein was confirmed for selected clones using immunohistochemistry and western blotting (Figure 1C,D).

The impact of  $\alpha$ Syn on cell proliferation was assessed using an MTS assay. Over a 10-day period, six low  $\alpha$ Syn lines (S9, S12, S13, S17, S22, S34) and 3 high  $\alpha$ Syn lines (S8, S36, S37) were examined and each showed a similar rate of proliferation (Supplementary Figure 1). There was no significant difference in the proliferation rate of low and high  $\alpha$ Syn groups and linear regression analysis showed no correlation between *SNCA* expression and proliferation rate of the examined cell lines ( $R^2=0.003$ ,  $p=0.884$ ).

Multiple clonal lines were differentiated into cortical neural progenitors using a dual-Smad inhibition protocol (Figure 2A) (Chambers et al., 2009; Shi et al., 2012). RNA was isolated and qRT-PCR used

to quantify *NCAM* and *MAPT* expression at day 11 and compared to *SNCA* expression at the start of differentiation (Figure 2B). There was no correlation in day 11 *NCAM* ( $R^2=0.008$ ,  $p=0.761$ ) nor day 11 *MAPT* ( $R^2=0.019$ ,  $p=0.461$ ) levels relative to *SNCA* expression for the clonal lines. hESC lines with low or high  $\alpha$ Syn expression differentiated equally well to form PAX6-positive neuroectoderm by day 12 (Figure 2C). Furthermore, by day 45, there was similar expression of early cortical markers, TBR1 and CTIP2, in low and high  $\alpha$ Syn groups (Figure 2D). Despite the difference in  $\alpha$ Syn levels, both groups formed neuronal networks with the same degree of efficiency based on  $\beta$ III-Tubulin immunostaining (Figure 2E). This data provides evidence that  $\alpha$ Syn expression levels do not influence neuronal induction and differentiation potential across multiple clonal hESC lines.

To determine if transgenic *SNCA* expression was maintained during differentiation, total and transgenic *SNCA* levels were measured by qRT-PCR (Figure 3A). The primers for total *SNCA* were designed to target the coding region and primers for transgenic *SNCA* targeted the IRES region (Figure 3A). Total and transgenic levels of human *SNCA* were measured in self-renewing hESCs (day 0) and day 25 differentiated cortical cells. Day 25 was a suitable time point as the neural induction period has been completed and immature cortical neurons are forming. Total *SNCA* expression at day 0 was significantly higher in the high  $\alpha$ Syn vs low  $\alpha$ Syn hESC group (Figure 3B). Importantly, at day 25, the elevated expression of *SNCA* was maintained between the high  $\alpha$ Syn vs low  $\alpha$ Syn cortical neuron group ( $p<0.01$ ). Total *SNCA* levels did not significantly increase over each time point, day 0 vs day 25, for both high  $\alpha$ Syn and low  $\alpha$ Syn groups. Transgenic *SNCA* levels in undifferentiated hESCs were significantly higher in the high  $\alpha$ Syn vs low  $\alpha$ Syn group (Figure 3B) ( $p<0.01$ ). Day 25 high  $\alpha$ Syn vs low  $\alpha$ Syn cortical neurons also had higher transgenic *SNCA* ( $p<0.01$ ). Transgenic *SNCA* levels did not significantly increase or decrease between day 0 and day 25 for the high  $\alpha$ Syn and low  $\alpha$ Syn groups. Immunostaining and western blotting confirmed that high  $\alpha$ Syn expression was maintained following cortical neuron differentiation (Figure 3C,D). At day 72 of cortical differentiation the hiPSC line, AST18, containing an *SNCA* triplication mutation exhibited a 3-fold increase in  $\alpha$ Syn expression compared to a control hiPSC line, NAS2, derived from a 1<sup>st</sup>-degree relative (Devine et al., 2011) (Figure 3D). The S37 transgenic cell line maintained high  $\alpha$ Syn expression similar to AST18 neurons, while the S36 hESC line, that expressed the most *SNCA* at day 0 (Figure 1B), now had low  $\alpha$ Syn expression by day 72 of differentiation, suggesting significant transgene silencing (Figure 3D). This is not unexpected as transgene expression is contingent on several factors, including site of integration, number of copies of the transgene, as well as transgene silencing over cell passage or differentiation (Liu et al., 2009).

*$\alpha$ Syn over-expression during cortical differentiation does not alter the transcriptional signature associated with neurogenesis*

The transcriptomic profile of self-renewing hESC lines (day 0) and differentiated cortical neurons (day 25) with high  $\alpha$ Syn and low  $\alpha$ Syn were investigated using RNA-seq analysis. A total of 17 samples were subjected to UPX 3'-sequencing to measure polyadenylated mRNA transcripts across 4 sample groups (i) low  $\alpha$ Syn hESCs, (ii) high  $\alpha$ Syn hESCs, (iii) low  $\alpha$ Syn cortical neurons, and (iv) high  $\alpha$ Syn cortical neurons (Figure 4A). A Principal Component Analysis (PCA) plot showed a clear segregation between hESCs and cortical neurons, represented by 83% variance on PC1 (Figure 4B). The PC2 axis was representative of  $\alpha$ Syn-related differences between hESC and cortical neuron samples. The hESC samples were intermixed, but cortical neuron samples segregated based on  $\alpha$ Syn expression, however, the variance along PC2 was small (5%). This is further corroborated by hierarchical clustering analysis based on all differentially expressed genes across the four sample groups (Figure 4C).

A pairwise comparison of self-renewing high  $\alpha$ Syn vs low  $\alpha$ Syn hESC lines found only 2 genes (*CBR1*, *CTNNA3*) were significantly differentially expressed between the two groups (Figure 5A), indicating  $\alpha$ Syn does not impact on the pluripotency transcriptome. As expected, comparisons of low  $\alpha$ Syn cortical neurons and low  $\alpha$ Syn hESCs, as well as high  $\alpha$ Syn cortical neurons and high  $\alpha$ Syn hESCs, identified large numbers of differentially expressed genes (3429 and 4188, respectively, Figure 5B,C; Supplementary Table S1). Seven of the top ten most significantly upregulated genes were the same for these two pairwise comparisons, including *SOX5*, *NPAS3*, *MALAT1*, *MAP2*, *QKI*, *PCDH9* and *AC10729.1* (Figure 5D). Most of these genes have a role in neurogenesis (Brunskill et al., 1999; Chen et al., 2016; Hardy et al., 1996; Izant and McIntosh, 1980; Strehl et al., 1998; Wunderle et al., 1996). Similarly, five of the top ten significantly downregulated genes were the same in the hESCs vs cortical neuron comparisons for high and low  $\alpha$ Syn cell lines, including *DPPA4*, *L1TD1*, *RBM47*, *XACT* and *DNMT3B* (Figure 5D). Most of these top downregulated genes have roles in pluripotency (Emani et al., 2015; Hu et al., 2012; Madan et al., 2009; Radine et al., 2020; Vallot et al., 2013). There was a large overlap in the genes that were significantly upregulated and downregulated in cortical neuron vs hESC groups with high or low  $\alpha$ Syn (Figure 6A). There was also a substantial overlap of gene ontology (GO) terms significantly upregulated and downregulated in the high or low  $\alpha$ Syn comparisons (Figure 6B). The most significantly enriched KEGG pathway in both high and low  $\alpha$ Syn cortical neuron vs hESC comparisons for upregulated genes was 'axon guidance' (KEGG:04360). Five other top ten KEGG pathways linked with upregulated genes were the same for both the high  $\alpha$ Syn and low  $\alpha$ Syn cortical neuron vs hESC comparisons (Figure 6C). The 'ribosome' term (KEGG:03010) was the most significant downregulated pathway common to both comparisons. Interestingly, the Parkinson's disease KEGG pathway was downregulated in high  $\alpha$ Syn cortical neurons vs high  $\alpha$ Syn hESCs, due to the downregulation of several mitochondrial genes and cytochrome c oxidase genes,



including *NDUFB9*, *MT-CO2*, *MT-CO3*, *MT-ATP6*, *MT-ATP8*, *MT-CYB*, *COX7C* and *CYCS*. This may reflect a mitochondrial phenotype caused by elevated  $\alpha$ Syn expression in cortical neurons. The data so far suggests that the process of cortical neuron differentiation induced a large number of significant gene expression changes, and that the level of  $\alpha$ Syn in these cells does not impair this process.

The key group comparison was that of high  $\alpha$ Syn cortical neurons vs low  $\alpha$ Syn cortical neurons. The volcano plot, in comparison to the cortical neurons vs hESC plots, identified a total of 47 differentially expressed genes (Figure 7A; Supplementary Table S1). KEGG pathway analysis did not show any relevant neurogenesis-related pathways enriched in high  $\alpha$ Syn vs low  $\alpha$ Syn cortical neurons (Figure 7B). Selected gene expression analysis revealed that the pluripotency markers *POU5F1* (*OCT4*) and *NANOG* were significantly downregulated and neurogenesis markers, *ASCL1*, *MYT1L*, and *POU3F2*, were significantly upregulated in cortical neuron samples relative to hESC samples for both high  $\alpha$ Syn and low  $\alpha$ Syn groups (Figure 7C) (Chambers et al., 2003; Nichols et al., 1998; Vierbuchen et al., 2010). Analysis of genes implicated in axon guidance, including *MAP2*, *SLIT2*, *EPHB1* and *NCAM1* showed no difference in cortical neurons with low or high  $\alpha$ Syn, except for *NTN1* ( $p < 0.01$ ) (Figure 7D) (Borrell et al., 2012; Enriquez-Barreto et al., 2012; Izant and McIntosh, 1980; Kennedy et al., 1994). There were no significant differences in genes associated with synaptic development, in low  $\alpha$ Syn and high  $\alpha$ Syn cortical neurons, including *CADM1*, *NLGN1*, *SNAP25*, *SYP* and *DLG4* (Figure 7E) (Cho et al., 1992; Ichtchenko et al., 1995; Oyler et al., 1989; Stagi et al., 2010; Wiedenmann and Franke, 1985). Other markers were explored to ascertain telencephalic development. *FOXP1* and *PAX6*, cortical progenitor markers, and *CTIP2* and *TLE4*, markers of deep cortical layers, showed no significant differences in low and high  $\alpha$ Syn cortical neuron groups (Figure 7F) (Raciti et al., 2013). The superficial layer marker *SATB2*, was not significantly different between the low and high  $\alpha$ Syn cortical neurons, which is in keeping with its involvement in the later stages of cortical development (Mariani et al., 2012). Expression of the neuronal migration marker, *DCX*, also presented no significant variation between low or high  $\alpha$ Syn cortical neurons (Figure 7F) (Gleeson et al., 1999).

## Discussion

This study addressed the hypothesis that increased  $\alpha$ Syn expression does not impair cortical neuronal differentiation of human pluripotent stem cells. Across multiple clonal lines, multiple rounds of cortical neuron differentiation using two robust differentiation protocols and unbiased transcriptomic analysis, we show data to support this hypothesis. The level of *SNCA* expression, whether normal or increased, did not have a significant impact on the efficiency of cortical neuron differentiation. These findings resolve conflicting data in the field, and are highly relevant to studies

utilising human pluripotent stem cells (hESCs or iPSCs) with differential  $\alpha$ Syn expression to model synucleinopathies, such as PD, DLB and multiple system atrophy (MSA).

In this study,  $\alpha$ Syn over-expression occurred from day 0 onwards and was consistent during the process of cortical neuron differentiation for most of the lines investigated. We explored 29 *SNCA* transgenic hESC lines and found no correlation between  $\alpha$ Syn expression level and neural differentiation potential. Selected lines underwent unbiased transcriptomic analysis to further explore this hypothesis. As expected, significant differential gene expression was observed when cortical neurons were compared to undifferentiated hESCs for both high  $\alpha$ Syn and low  $\alpha$ Syn hESCs. Gene ontology (GO) and KEGG pathway analysis identified significant overlap in the group comparisons with high  $\alpha$ Syn or low  $\alpha$ Syn hESCs and their differentiated counterparts. Furthermore, most of the top differentially expressed genes were the same in these comparisons, indicating neurogenesis proceeded in a similar manner despite the level of  $\alpha$ Syn expression. The gene expression differences that were unique to the high  $\alpha$ Syn hESCs or to the low  $\alpha$ Syn hESCs could be due to a number of factors, including clonal variation, experiment-to-experiment variation, or due to a phenotype of elevated  $\alpha$ Syn expression, such as mitochondrial dysfunction. When high  $\alpha$ Syn and low  $\alpha$ Syn cortical neurons were directly compared to each other, only 47 genes were differentially expressed, and pathway analysis did not reveal anything relevant to cortical neuron induction or differentiation. Furthermore, read count analysis for well-characterised genes with known roles in neurogenesis and the development of cortical identity confirmed cortical differentiation occurred similarly between the high  $\alpha$ Syn and low  $\alpha$ Syn groups.

Research groups, including ourselves, have used hiPSCs derived from patients with *SNCA* multiplication mutations to model synucleinopathies (Brazdis et al., 2020; Byers et al., 2011; Chen et al., 2019; Devine et al., 2011; Flierl et al., 2014; Lin et al., 2016; Oliveira et al., 2015; Prots et al., 2018). We previously showed, using eight clonal hiPSC lines, harbouring the *SNCA* triplication mutation and six hiPSC lines from a non-affected first-degree relative, that the main sources of variation in differentiation efficiency were due to differences between clonal lines, reprogramming efficiency, and the process of neuronal differentiation itself (Devine et al., 2011). Whilst cellular reprogramming is a powerful method for generating human disease models, reprogramming can be incomplete and can introduce coding mutations or large chromosomal abnormalities that may lead to altered differentiation potential of different clones (Boulting et al., 2011; Hussein et al., 2011; Mayshar et al., 2010). Furthermore, in these patient-derived iPSCs the size of the multiplied region is variable and other adjacent genes such as *MMRN1* may be incorporated (Ross et al., 2008). Over-expression of other coding genes in these iPSC lines presents another potential confounding factor when investigating and interpreting neuronal differentiation potential. A number



of these caveats apply to studies differentiating hiPSCs with a *SNCA* triplication into neuronal progenitors or dopaminergic neurons (Flierl et al., 2014; Oliveira et al., 2015). In particular, limited clonal lines were examined and siRNA knock-down of *SNCA* 'rescue' of dopaminergic differentiation was partial (Oliveira et al., 2015).

To further highlight the point regarding clonal variation and conflicting reports in the literature, recent studies have shown, using hiPSCs from patients with a *SNCA* duplication mutation, that cortical neurons (Prots et al., 2018) and dopaminergic neurons can be efficiently and comparably generated using these hiPSC lines (Brazdis et al., 2020). Other independent groups have also used hiPSCs with a *SNCA* triplication mutation to show functional dopaminergic neuron generation comparable to control hiPSC lines (Byers et al., 2011; Lin et al., 2016). We recently showed that reducing *SNCA* alleles in hESCs also does not affect neuronal differentiation; wild type, *SNCA*<sup>+/-</sup> and *SNCA*<sup>-/-</sup> hESC lines showed no differences in differentiation into dopaminergic neurons (Chen et al., 2019). In the studies reporting no impairment of dopaminergic neuron differentiation with a *SNCA* triplication, PD-related phenotypes, including reduced synchronous firing on microelectrode recordings and increased susceptibility to oxidative stress were observed (Brazdis et al., 2020; Lin et al., 2016). While there may be  $\alpha$ Syn-related phenotypic differences or inherent vulnerabilities due to elevated  $\alpha$ Syn expression in mature neurons, this does not imply that the process of neuronal differentiation itself is impaired.

When  $\alpha$ Syn was over-expressed using a lentiviral system in hESC-derived neuroectoderm impaired neuronal patterning and acute toxicity were reported (Schneider et al., 2007). Dopaminergic and GABAergic neuron populations were affected by  $\alpha$ Syn over-expression, but this was only quantified in a single hESC line (H9), and the toxicity shown to be occurring could result in selective neuronal loss, making the interpretation of differentiation marker analysis challenging (Schneider et al., 2007). Similar caveats apply to work performed using AF22 neural stem cells with doxycycline-inducible  $\alpha$ Syn expression. Exposure to doxycycline may cause pleiotropic effects, and  $\alpha$ Syn expression was not sustained throughout differentiation (Zasso et al., 2018).

It is important to consider that neuronal differentiation protocols often require optimisation for each clonal line and small variations in ligand concentrations, specifically CHIR99021 in the midbrain dopaminergic differentiation protocol, can impair neurogenesis. For example, in the study by Oliveira *et al.*, the dopaminergic differentiation protocol yielded less than eight per cent of TH-positive neurons in the control lines (Oliveira et al., 2015). Whilst our study does not yield insight into the impact of elevated  $\alpha$ Syn expression on dopaminergic differentiation, a subject for future studies, the cortical neuron protocols used were robust with the vast majority of cells producing cortical neurons.

In summary, this work shows that elevated human  $\alpha$ Syn expression in isogenic clonal hESC lines does not impair cortical neurogenesis. This supports the validity of using human pluripotent stem cells, such as iPSCs with *SNCA* multiplications, to model synucleinopathies, and highlights the need for efforts to closely match the differentiation stage and maturity of neurons prior to commencing with disease modelling.

## Methods

### Generation of transgenic hESC lines by nucleofection

Shef4 hESCs were provided Prof D Hay (University of Edinburgh) following MRC Steering Committee approval (SCSC11-60). The plasmid consisting of wild-type human *SNCA* (pcDNA3.1) was provided by Prof J Hardy (UCL). The PGK-Puro-pCAGS and FCT-IRES-Venus-pBS plasmids were provided by William Hamilton (University of Edinburgh).

IRES-Venus and human *SNCA* fragments were amplified by PCR (MJ Research, PTC-200 Peltier Thermal Cycler) and purified using DNA Clean & Concentrator™-5 Kit (Zymo Research, D4003) to provide 20  $\mu$ l of eluted DNA. 1X BSA, 1X digestion buffer and 50 U digestion enzyme (all New England Biolabs®) were used to digest the plasmid DNA, which was then purified from agarose gel using Zymoclean™ Gel DNA Recovery Kit (Zymo Research, D4001) per manufacturer's protocol. Purified and digested DNA was ligated to PCR products at 16°C overnight in a final volume of 20  $\mu$ l using 2 U of T4 DNA ligase and 1x ligation buffer (Roche, 10481220001). Plasmid DNA was transformed into TOP10 chemically competent cells (Invitrogen, c4040-10) by the heat-shock method. Plasmid DNA was extracted using QIAprep®-Spin Miniprep kit (Qiagen, 27104) or Maxiprep (Qiagen, 12662) systems per manufacturer's protocol, then desalted using Millipore centrifugal filter units (Millipore, UFC503024 24PK). The final pCAG-SNCA-IRES-Venus construct contained human *SNCA*, internal ribosome entry site (IRES) and Venus expression cassette under the constitutive pCAG promoter, as well as a puromycin resistance gene (Puro<sup>r</sup>) driven by the PGK promoter. The control construct, pCAG-IRES-Venus, contained the same elements except for the *SNCA* gene (Figure 1A).

The Neon Transfection System (Invitrogen, MPK5000) was used for nucleofection of both constructs into Shef4 hESCs as per the manufacturer's protocol. 1  $\mu$ g/ml puromycin was added to the culture media for at least two weeks to isolate clones and colonies, manually picked for expansion and cryopreservation. Clones were screened for *SNCA* over-expression by qRT-PCR.

### Quantitative RT-PCR

The MasterPure™ Complete DNA and RNA Purification kit (Epicentre, MC85200) or the RNeasy kit (Qiagen, 74104) was used for RNA extraction. Genomic DNA was removed using DNase I

(Promega, M6101). cDNA was synthesised from 500 ng total RNA using M-MLV reverse transcriptase (RT, ThermoFisher Scientific, 28025013) or Superscript IV reverse transcriptase (Invitrogen, 18090010). qRT-PCR was performed using a LightCycler™ 480 (Roche) with the following parameters: (95°C for 10 min), [(95°C for 10 sec) + (60°C for 20 sec)] over 45 cycles. Intron-spanning primers were designed using the Universal Probe Library (UPL) Assay design centre (Roche). Primer sequences and UPL probes were total *SNCA* F-tgggcaagaatgaagaaggagc, R-gtgggtgacgggtgtgacagc Probe 68; transgenic *SNCA* F-cgacctgcagttggacct, R-tgacaatgacatccactttgc Probe 163; *NCAM* F-gcgttgagagtccaaattc, R-gggagaaccaggagatgtcttt Probe 51; *MAPT* F-accacagccaccttctct, R-cagccatcctggttcaaagt Probe 55; TATA-box binding protein (*TBP*) F-atagggattccgggagtc, R-gaacatcatggatcagaacaaca Probe 87. Each 10µl reaction was performed in triplicate and results normalised to *TBP* expression.

#### MTS Assay

Cell proliferation was assessed using a colorimetric assay, CellTiter96® AQueous One Solution Cell Proliferation Assay or MTS assay. In this test, MTS tetrazolium is bio-reduced in viable cells (Supplementary Figure 1).

#### hESC and hiPSC culture

Shf4-derived transgenic hESC lines, and AST18 and NAS2 hiPSCs were expanded in culture on either Matrigel-coated 6-well plates (BD, 356234) in mTeSR1 medium (Stemcell™ Technologies, 05850) or on Laminin-521 (BioLamina, LN521) coated 6-well plates in StemMACS iPS-Brew XF, human (Miltenyi Biotec, 130-107-086). 1 µg/ml puromycin (Sigma, P8833) was used in the culture media of Tg hESCs to maintain the expression of the transgenes.

#### Cortical neuronal differentiation

Two cortical neuron differentiation protocols were used, referred to as CD protocol 1 and CD protocol 2, respectively. CD protocol 1 was adapted from the cortical neuron differentiation protocol published by Chambers et al., in 2009 and CD protocol 2 was adapted from the published protocol by Shi et al., in 2012 (Chambers et al., 2009; Shi et al., 2012). Both protocols use dual Smad inhibition to induce cortical neuron differentiation. In CD protocol 1, neural differentiation was started by changing the culture media to neural induction media (NIM) which included 10 µM SB431542 (Tocris, 616461) and 100 nM LDN-193189 (Stemgent, 04-0019). NIM for this protocol was prepared by mixing 1:1 DMEM/F12 (Gibco, 20331-020) and Neurobasal medium (Gibco, 21103-049), supplemented with 1 ml N2 and 2 ml B27 with retinoic acid (Gibco, 17504-044). NIM was also supplemented with 2 mM L-glutamine, 0.1 mM β-mercaptoethanol (BDH, 44143-31), 100 U/ml penicillin and 100 µg/ml streptomycin (Invitrogen, 15140-122) and 100µM non-essential amino acids (Gibco, 1140-035). Cells were lifted using dispase at day 12, dissociated into clumps and plated on 10 µg/ml Laminin-111 (Sigma L2020-1MG) and 15 µg/ml poly-L-ornithine-coated plates (Sigma, P4957). 100 nM LDN and 20 µg/ml FGF2 were included in the NIM, and SB431542 removed from

day 12. Following 7-10 days of progenitor colony expansion, cells were lifted using accutase and plated onto Laminin-111/ poly-L-ornithine-coated plates in NIM supplemented with 10 ng/ml BDNF (Peprotech, 450-02) and 10 ng/ml GDNF (Peprotech, 450-10). Half media changes were performed every 3 days during the neuronal maturation phase up to day 83.

In CD protocol 2 hESCs at 80%-90% confluency in 6-well plates were lifted with 1 ml/well UltraPure 0.5 M EDTA (Invitrogen, 15575038), counted, and transferred onto 5 µg/ml Laminin-111 coated (Biolamina, LN111-04) 24-well plates (Corning, 3527), at an initial plating density of 80,000 cells/cm<sup>2</sup>. 600 µl/well neural induction media (NIM) was used until day 4 of differentiation. NIM was composed of 50% DMEM/F12 (ThermoFisher Scientific, 21331020) and 50% Neurobasal Media (ThermoFisher Scientific, 21103049), B27 supplement with Retinoic Acid (ThermoFisher Scientific, 17504044), N2 supplement (ThermoFisher Scientific, 17502048) and 2 mM L-Glutamine (ThermoFisher Scientific, 25030123). From day 4 onwards, 50% NIM, 25% DMEM/F12 and 25% Neurobasal Media with 2 mM L-glutamine. For the first 12 days of differentiation, 10 µM SB431542 (Tocris, 616461) and 100 nM LDN-193189 (Miltenyi Biotec, 130-103-925) were added to the NIM and this media was replaced every two days. Cells were lifted at day 12 and day 17 with Collagenase Type IV (Life Technologies, 17104019) diluted in HBSS (ThermoFisher Scientific, 14025). Cell were lifted and passaged as clumps in a ratio of 1:1.5 and 1:2 at day 12 and 17, respectively. 10 µM Y27632 (Tocris) was used in the media for each cell lift. At day 25, differentiated cells were lifted with Accutase (Sigma, A6964) and cell pellets frozen using a dry ice and ethanol bath for RNA isolation.

### Transcriptomic analysis

Total RNA was isolated with RNeasy kit (QIAGEN, 74104). RNA integrity (RINe  $\geq 7$ ) was confirmed using TapeStation 4200 (Agilent). The median RINe score was 9.2. Samples were collected at day 0 and day 25, across three sets of cortical neuron differentiations (Figure 4A). The samples were processed by Qiagen Genomic Services using their QIAseq UPX 3' Transcriptome kit and libraries were sequenced on a NextSeq500 instrument. The total number of polyadenylated 3' transcript reads and the mean number of reads per unique molecular identifier were counted. The raw transcript counts were analysed using DESeq2 (Love et al., 2014) differential expression analysis in R studio. Pairwise analysis was used to compare hESC vs cortical neurons with high or low  $\alpha$ Syn. A padj cut off value of 0.05 and a log<sub>2</sub> fold-change cut off value of 1.2, were used. KEGG pathway analysis was performed using the g:GOST function in the CRAN gprofiler2 package (Raudvere et al., 2019). RNA-seq data has been deposited on the Gene Expression Omnibus (GEO Accession number: GSE195877).

### Immunocytochemistry

Immunostaining was performed on cells cultured on 13-mm glass coverslips or in Ibidi 8-well plates. Spent medium was removed and cells fixed with 4% PFA for 15 minutes. Following 3 PBS

(ThermoFisher Scientific) washes, the cells were permeabilised and blocked with 2% goat (or donkey) serum (Sigma) in 0.1% Triton-X-100 (Fisher) in PBS for 45 minutes prior to overnight incubation at 4°C with primary antibodies. The primary antibodies used were  $\beta$ -III tubulin (1:1,000, mouse IgG2b, Sigma T8660), CTIP2 (1:500, rat IgG2a, Abcam ab18465), PAX6 (1:40, mouse IgG1, DSHB ab528427), TBR1 (1:200, rabbit IgG, Abcam ab31940) and total  $\alpha$ Syn (1:1000, mouse IgG1, BD 610787). Secondary antibodies were applied at room temperature for 1 hour in the dark. These were Alexa Fluor 488 (ThermoFisher Scientific, A21121), Alexa Fluor 488 (ThermoFisher Scientific, A21131), Alexa Fluor 488 (ThermoFisher Scientific, A21208), Alexa Fluor 555 (ThermoFisher Scientific, A21127), Alexa Fluor 555 (ThermoFisher Scientific, A21428), Alexa Fluor 555 (ThermoFisher Scientific, A31572), Alexa Fluor 647 (ThermoFisher Scientific, A21242) and Alexa Fluor 647 (ThermoFisher Scientific, Ab150107). Following a further three PBS washes, slides were mounted using Fluorsave (Merck, 345789). 0.1  $\mu$ g/ml 4',6-diamidino-2-phenylindole (DAPI, Life Technologies) was used to stain nuclei.

#### Image capture, processing and quantification

The Eclipse Ti (Nikon) and/ or the Axio Observer (Zeiss) microscopes were used to acquire the images presented. Huygens Software (Scientific Volume Imaging) was used for deconvolution of Z stack images (at least 10 images/ stack and maximum intensity pixel projection used). Fiji software was used for image analysis and quantification, with identical brightness and contrast values used for each image channel and for each experiment. Macro scripts were used to split the image channels, threshold and binarize for quantification.

#### Western blotting

RIPA Lysis Buffer (Santa Cruz, sc-24948) was used to lyse cell pellets and protein concentration determined using the Micro BCA Protein Assay kit (ThermoFisher Scientific, 232350). 10  $\mu$ g protein, per sample, was mixed and incubated with 5  $\mu$ l NuPAGE™ LDS Sample Buffer (ThermoFisher Scientific, NP0007) and 2  $\mu$ l 1M DTT (ThermoFisher Scientific, NP0004) prior to loading on a NuPAGE™ 4%–12% Bis-Tris Gradient Gel (ThermoFisher Scientific, NP0322BOX). SeeBlue™ Plus2 Pre-stained Protein Standard (5  $\mu$ l, Thermo Fisher Scientific, LC5925) was used as a standard. Following electrophoresis, protein was transferred onto a 0.45  $\mu$ m nitrocellulose (Amersham Protran Premium, 10600096) or a PVDF membrane (GE Healthcare Amersham Hybond ECL, RPN68D). 0.4% PFA was used to fix the protein on the membrane. One minute of methanol (Fisher Scientific, M/3900/17) immersion was done, in addition, if a PVDF membrane was used. Membranes were immersed in blotting-grade blocker (BioRad, 1706404) in 0.1% TBS-Tween for an hour at room temperature and then the primary antibody, mouse anti- $\alpha$ Syn (1:1000, BD) overnight at 4°C. Following three washes in 0.1% TBS-Tween, 1:2000 HRP-conjugated anti-mouse IgG (Promega) secondary antibody was applied for two hours at room temperature. Pierce™ ECL Western Blotting Substrate (ThermoFisher Scientific, 32109) was then added to the membrane for



image capture using the LI-COR Odyssey imaging system (Biosciences). Antibodies were stripped with the Restore™ PLUS Western Blot Stripping Buffer (ThermoFisher Scientific, 46430). The blocking step was repeated and secondary antibody, HRP-conjugated anti-β-Actin antibody (1:1000, Abcam) applied. The Pierce™ ECL Western Blotting Substrate was again used prior to imaging the membrane.

### Statistics

Statistical tests were performed using SPSS v23 and include the Student's t-test or t-test with Welch's correction, linear regression analysis and the Mann-Whitney U test for non-parametric data. Each Figure legend details which test was used for each statistical comparison. Significance level cut off was  $p < 0.05$ .

### **Acknowledgments**

The authors wish to thank the Wellcome Trust and the MRC for funding this project. We are very grateful to Prof Steven Pollard for critical comments on the manuscript, and Dr James Ashmore for bioinformatics guidance. We also sincerely thank Prof John Hardy and Dr William Hamilton for pcDNA3.1-SNCA and PGK-Puro-pCAGS plasmids, respectively, and Prof David Hay for Shef4 hESCs.

### **Author contributions**

TK conceived the project. TK, AN, RY designed the experiments. AN and RY performed the experiments and analysed the data. RB performed bioinformatic analysis. AN and TK wrote the manuscript, and all authors reviewed and approved the manuscript.



## Figure 1

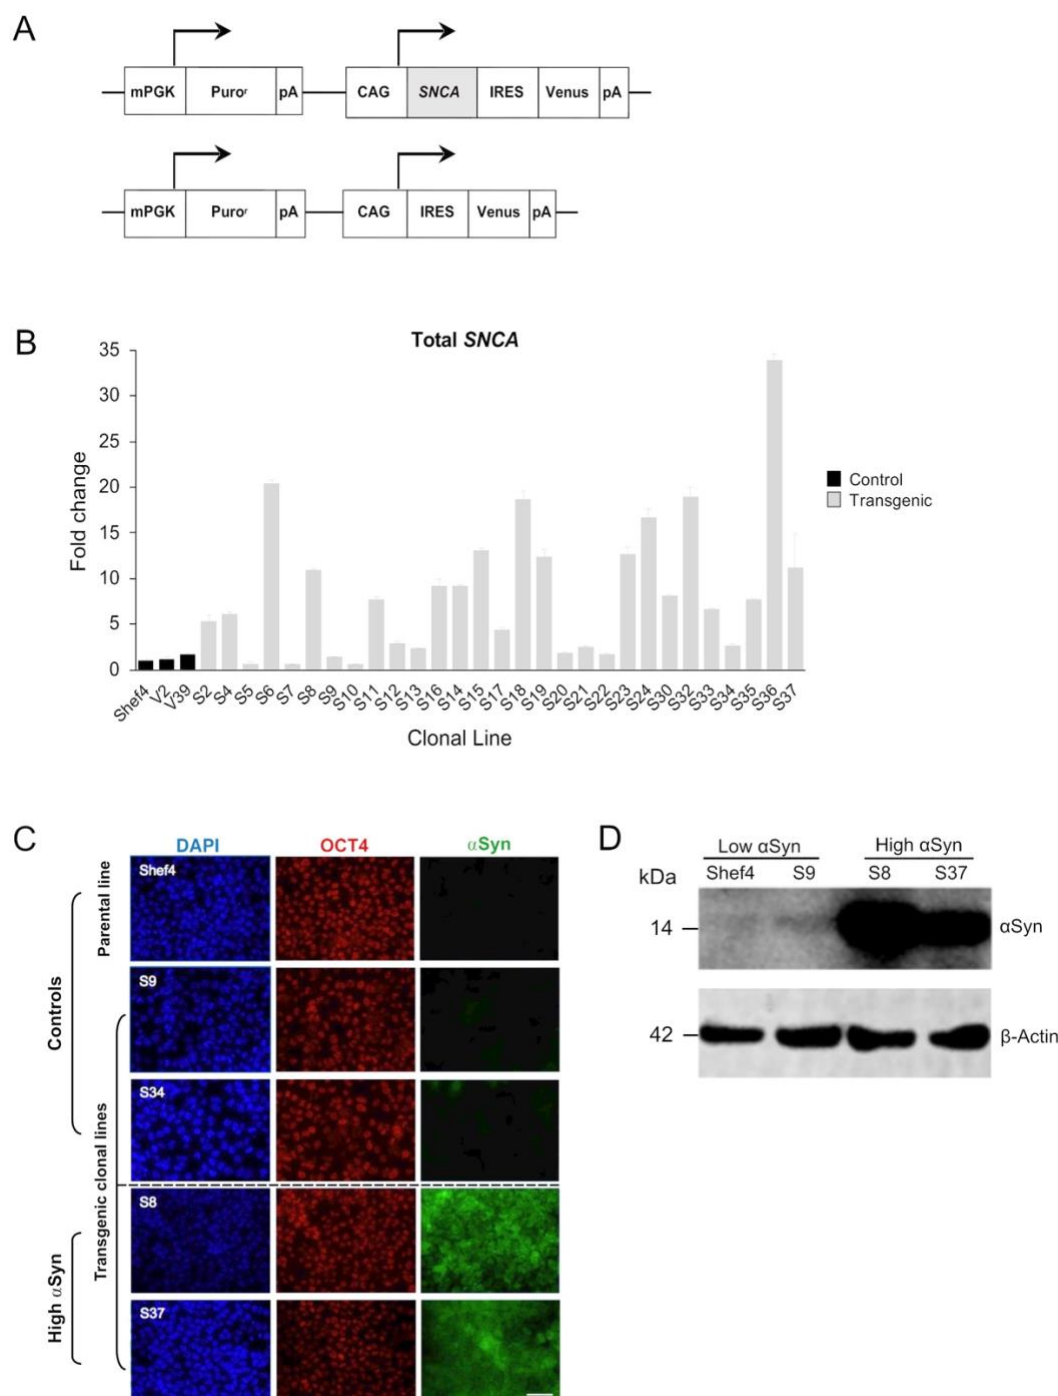

**Figure 1. Establishment of clonal hESC lines over-expressing  $\alpha$ Syn.** (A) Schematic of pCAG-SNCA-IRES-Venus and pCAG-IRES-Venus constructs transfected into Shef4 hESCs to generate clonal lines. (B) Quantitative RT-PCR measuring total *SNCA* expression (mRNA) levels in multiple self-renewing undifferentiated transgenic clones generated from parental Shef4 hESC lines. Data was normalised to 18S rRNA levels, and shown relative to expression in the parental hESC Shef4 line. Each bar represents the mean and standard deviation of 3 technical replicates. (C) Representative immunocytochemistry images of undifferentiated hESC clones derived from the parental cell line Shef4, and transgenic clonal lines S9, S34, S8, and S37, stained for DAPI (blue), OCT4 (red), and  $\alpha$ Syn (green). Scale bar = 50  $\mu$ m. (D) Western blot for total  $\alpha$ Syn and  $\beta$ -actin in undifferentiated clonal lines for Shef4 and S9 (low  $\alpha$ Syn), and S8 and S37 (high  $\alpha$ Syn) clones.

**Figure 2**

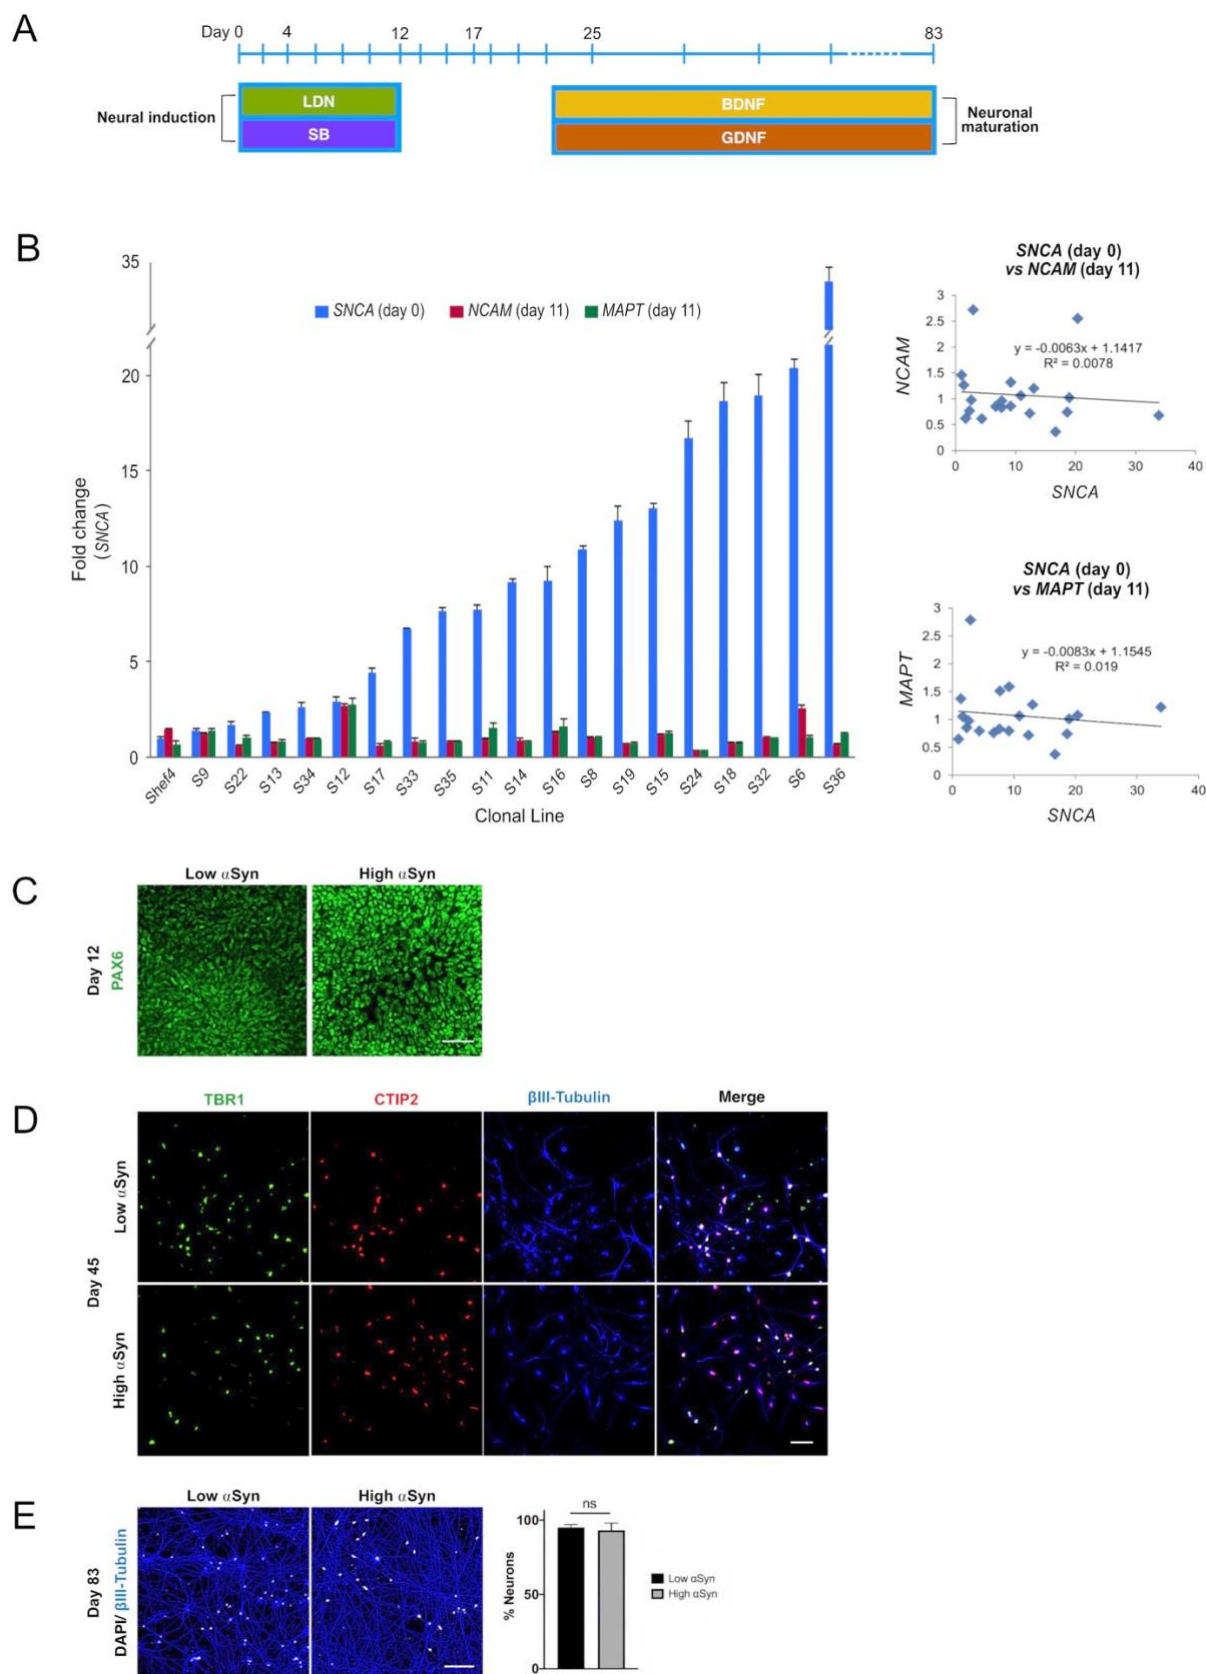

**Figure 2. Level of  $\alpha$ Syn does not impair cortical neuron differentiation.** (A) Schematic summarising key stages of the cortical neuron differentiation protocol. Cell lifts were carried out at days 12, 17, and 25. Dual Smad inhibition using SB431542 (SB) and LDN-193189 (LDN) was employed early to drive neural induction and cortical identity, and the growth factors BDNF and GDNF were used to promote neuronal maturation after day 25. (B) Quantitative RT-PCR data measuring total *SNCA* expression in

undifferentiated transgenic Shf4 cell lines, and *NCAM* and *MAPT* mRNA levels at day 11. Data shown as relative fold-change to expression in the parental Shf4 line, and error bars represent the standard error of the mean (SEM). Linear regression analysis of *SNCA*, *NCAM*, and *MAPT* expression levels was performed ( $p = 0.174$  and  $p = 0.191$  for *NCAM* and *MAPT*, respectively). (C) Representative immunocytochemistry images at day 12 of low  $\alpha$ Syn and high  $\alpha$ Syn hESCs differentiated into neuroectoderm, stained for the cortical progenitor marker PAX6. Scale bar = 50  $\mu$ m. (D) Representative immunocytochemistry images of both low  $\alpha$ Syn and high  $\alpha$ Syn immature neurons (day 45) stained for the deep cortical layer markers TBR1 (green), CTIP2 (red), and  $\beta$ III-Tubulin (blue), as well as merged images. Scale bar = 50  $\mu$ m. (E) Immunocytochemistry images of neuronal networks representing both low  $\alpha$ Syn and high  $\alpha$ Syn hESCs differentiated into mature neurons (day 83), stained for the neuronal marker  $\beta$ III-Tubulin (blue) and DAPI (white). Scale bar = 100  $\mu$ m. Percentage neurons was calculated by quantifying DAPI levels relative to  $\beta$ III-Tubulin. Significance performed using a Welch's t-test. N = number of biological replicates (differentiated cell line) and n = technical replicates (number of wells per cell line) (N = 2, n = 5 for low  $\alpha$ Syn; N = 3, n = 8 for high  $\alpha$ Syn).

**Figure 3**

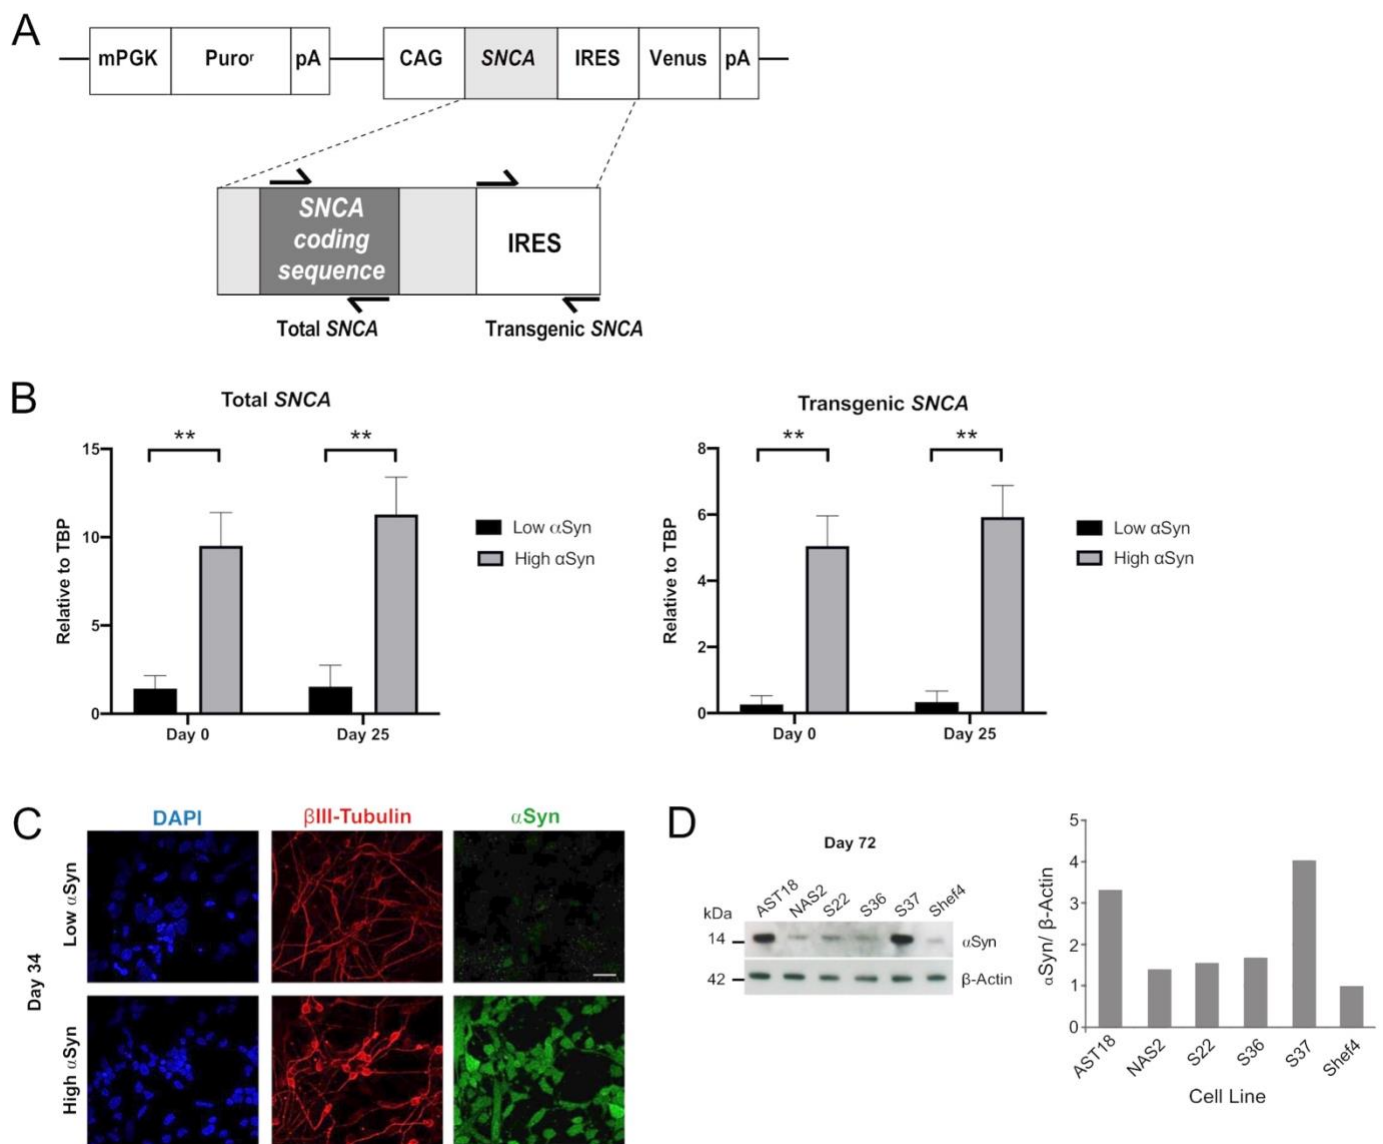

**Figure 3. Overexpression of  $\alpha$ Syn is maintained during cortical neuron differentiation.** (A) Schematic showing the regions of *SNCA* cDNA amplified to measure “Total *SNCA*”, and location of primers targeting the internal ribosome entry site (IRES) region to measure “Transgenic *SNCA*” levels. (B) Quantitative RT-PCR for total *SNCA* and transgenic *SNCA* expression for both low  $\alpha$ Syn and high  $\alpha$ Syn samples at day 0 (self-renewing hESCs) and day 25 (immature differentiated cortical neurons). Mean expression levels were quantified relative to the expression of *TBP* and error bars represent SEM. N = number of biological replicates (differentiated cell line) and n = technical replicates (number of wells per cell line). For both total and transgenic  $\alpha$ Syn, low  $\alpha$ Syn (N = 4, n = 4) and high  $\alpha$ Syn (N = 6 and n = 6). Statistical comparisons were performed using the Welch’s t-test (\*\* = 2-tailed p < 0.01). (C) Representative immunocytochemistry images of differentiated neuronal cells (day 34) derived from transgenic Shef4 clonal lines S37 and S9, stained for DAPI (blue),  $\beta$ III-Tubulin (red), and  $\alpha$ Syn (green). Scale bar = 30  $\mu$ m. (D) Western blot (left) for total  $\alpha$ Syn and  $\beta$ -actin in cortical neurons (day 72) differentiated from transgenic hESC and hiPSC cell lines.  $\alpha$ Syn levels quantified in ImageJ (right) for all cell lines relative to expression in Shef4-derived neurons.

## Figure 4

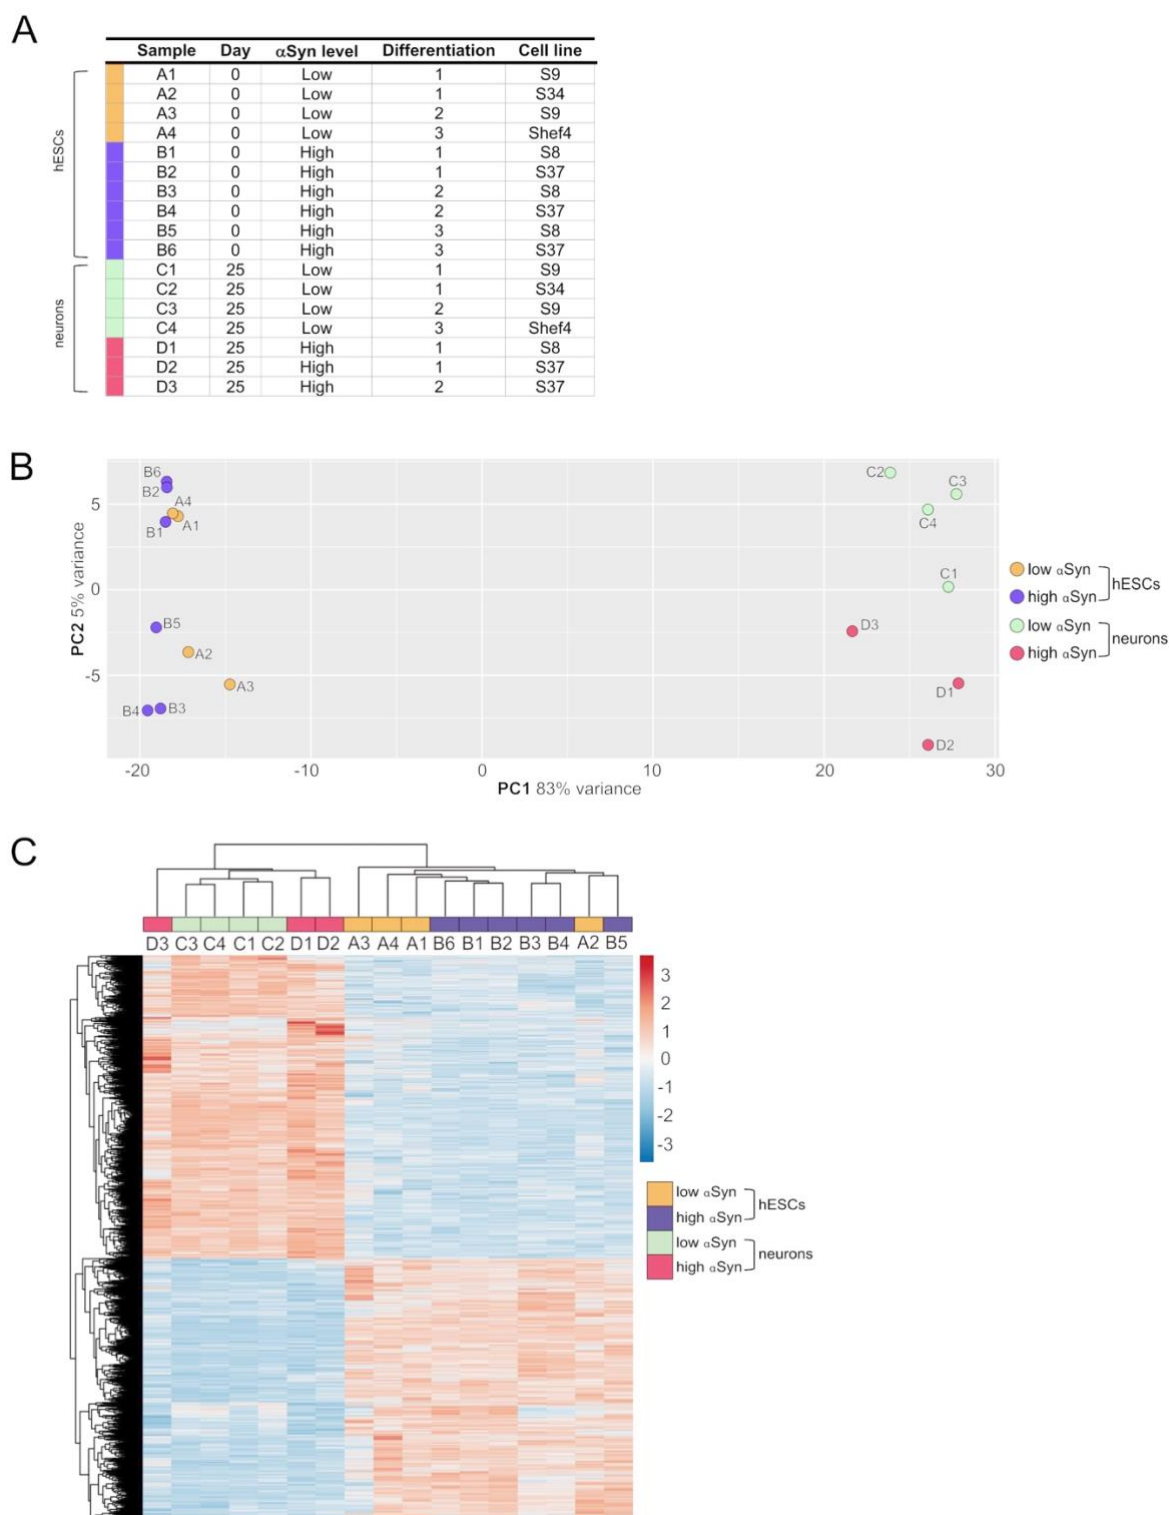

**Figure 4. RNA-seq analysis of clonal hESC lines and differentiated cortical neurons.** (A) Table of individual sample groups highlighting  $\alpha$ Syn levels, differentiation experiment group, and the cell line of samples. N = 3 for high  $\alpha$ Syn cortical neurons, N = 4 for both low  $\alpha$ Syn hESCs and cortical neurons, and N = 6 for high  $\alpha$ Syn hESCs. (B) Principal component analysis (PCA) plot of all samples. (C) Heatmap of a hierarchical cluster analysis of differential expression results, showing relative gene expression changes as either upregulated (red) or downregulated (blue). Analysis was carried out with  $\log_2$ -transformed raw counts. Plot encompasses all differentially expressed genes from all four DESeq2 pairwise comparisons, representing 5157 genes in total.



**Figure 5**

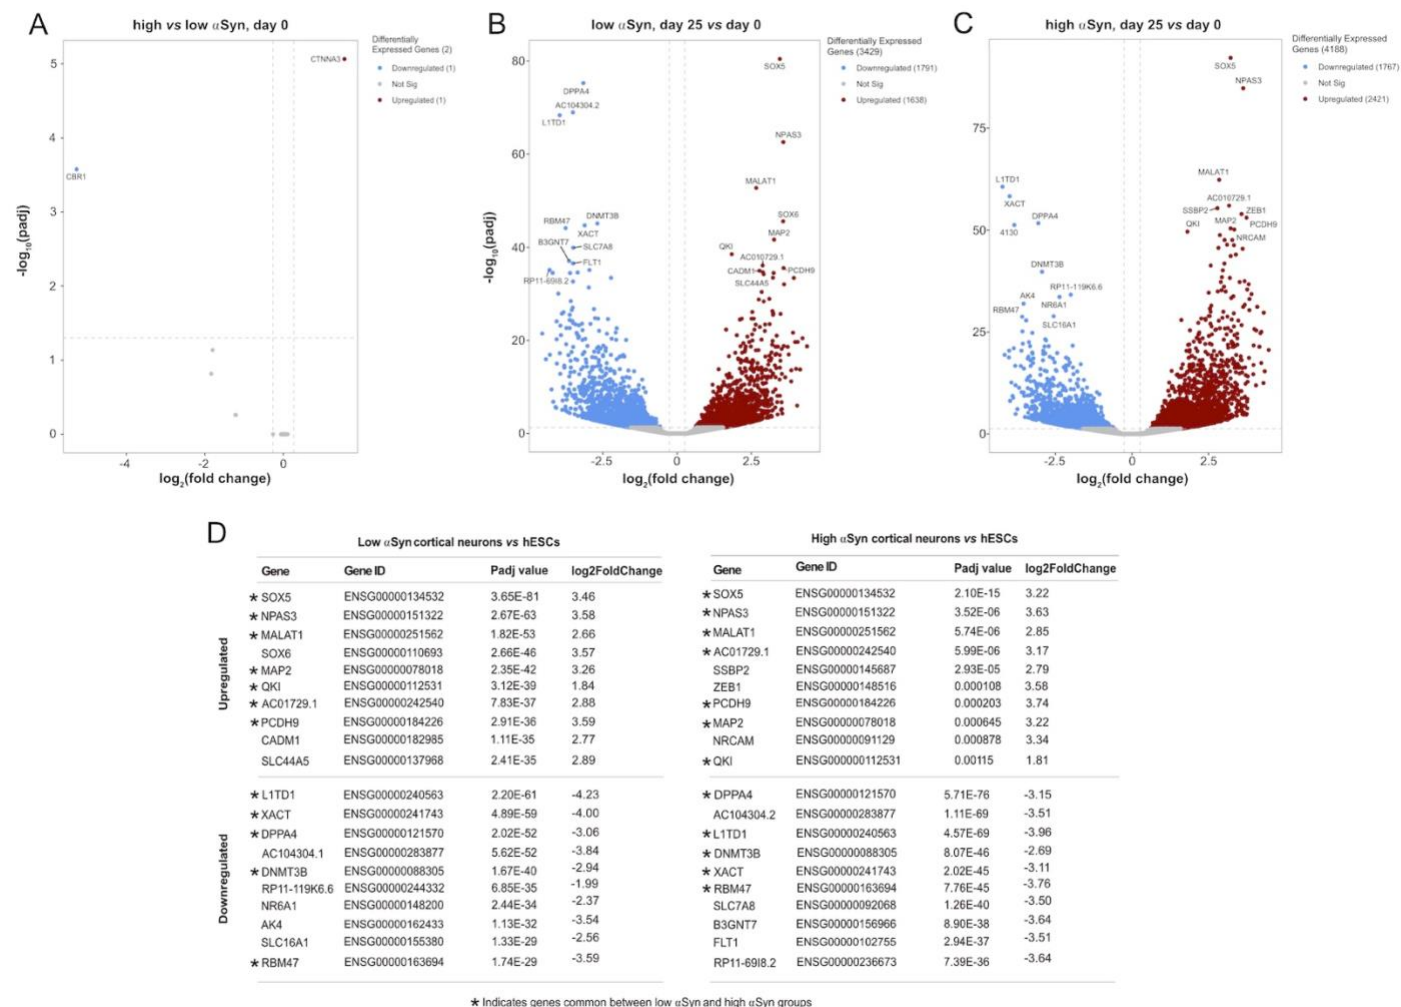

**Figure 5. RNA-seq reveals large and over-lapping gene expression changes between cortical neurons and hESCs for both low  $\alpha$ Syn and high  $\alpha$ Syn groups.** (A-C) Volcano plots showing differentially expressed genes between (A) low  $\alpha$ Syn hESCs and high  $\alpha$ Syn hESCs, (B) low  $\alpha$ Syn cortical neurons (day 25) vs hESCs (day 0), and (C) high  $\alpha$ Syn cortical neurons (day 25) vs hESCs (day 0). Horizontal dashed lines cross the y-axis at  $-\log_{10}(0.05)$ , representing a significance cut-off Padj value of 0.05. Vertical lines represent a fold-change cut-off of 1.2, and therefore cross the x-axis at 0.263 and -0.263.



**Figure 6**

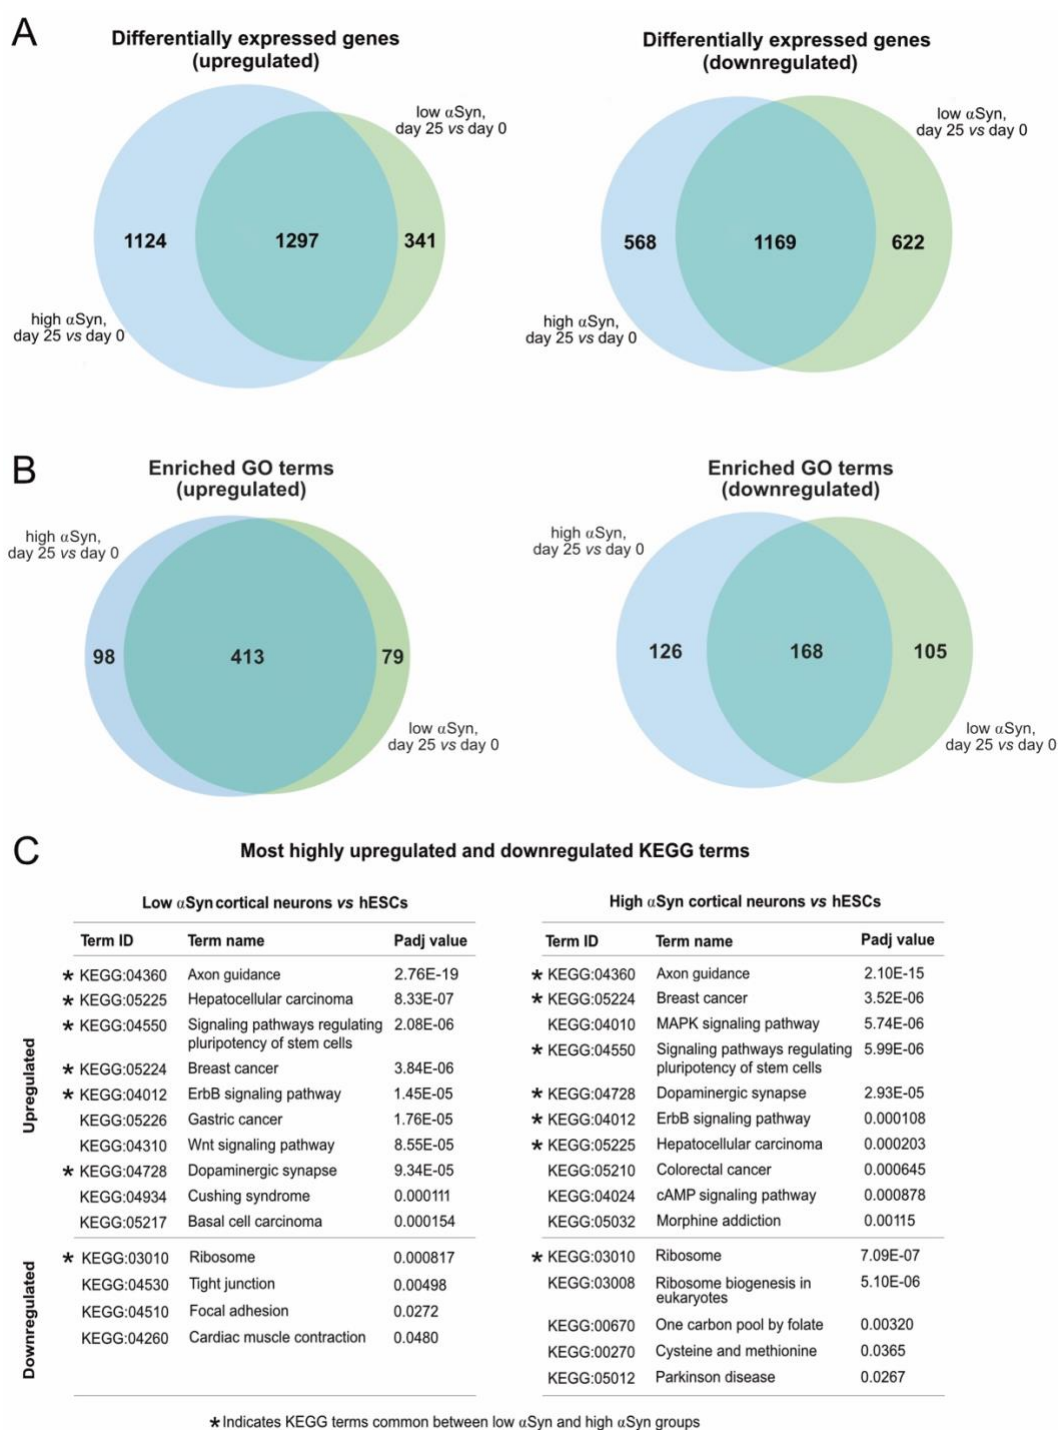

**Figure 6.** (A) Venn diagrams comparing upregulated and downregulated differentially expressed genes from low  $\alpha$ Syn cortical neurons vs hESCs and high  $\alpha$ Syn cortical neurons vs hESCs comparisons. (B) Venn diagrams comparing upregulated and downregulated GO terms from low  $\alpha$ Syn cortical neurons vs hESCs and high  $\alpha$ Syn cortical neurons vs hESCs comparisons. (C) List of top 10 upregulated and top 10 downregulated KEGG terms by Padj value, in order of ascending Padj, for low  $\alpha$ Syn cortical neurons vs hESCs and high  $\alpha$ Syn cortical neurons vs hESCs (if less than 10, all terms shown). KEGG terms common to both comparisons are indicated.

**Figure 7**

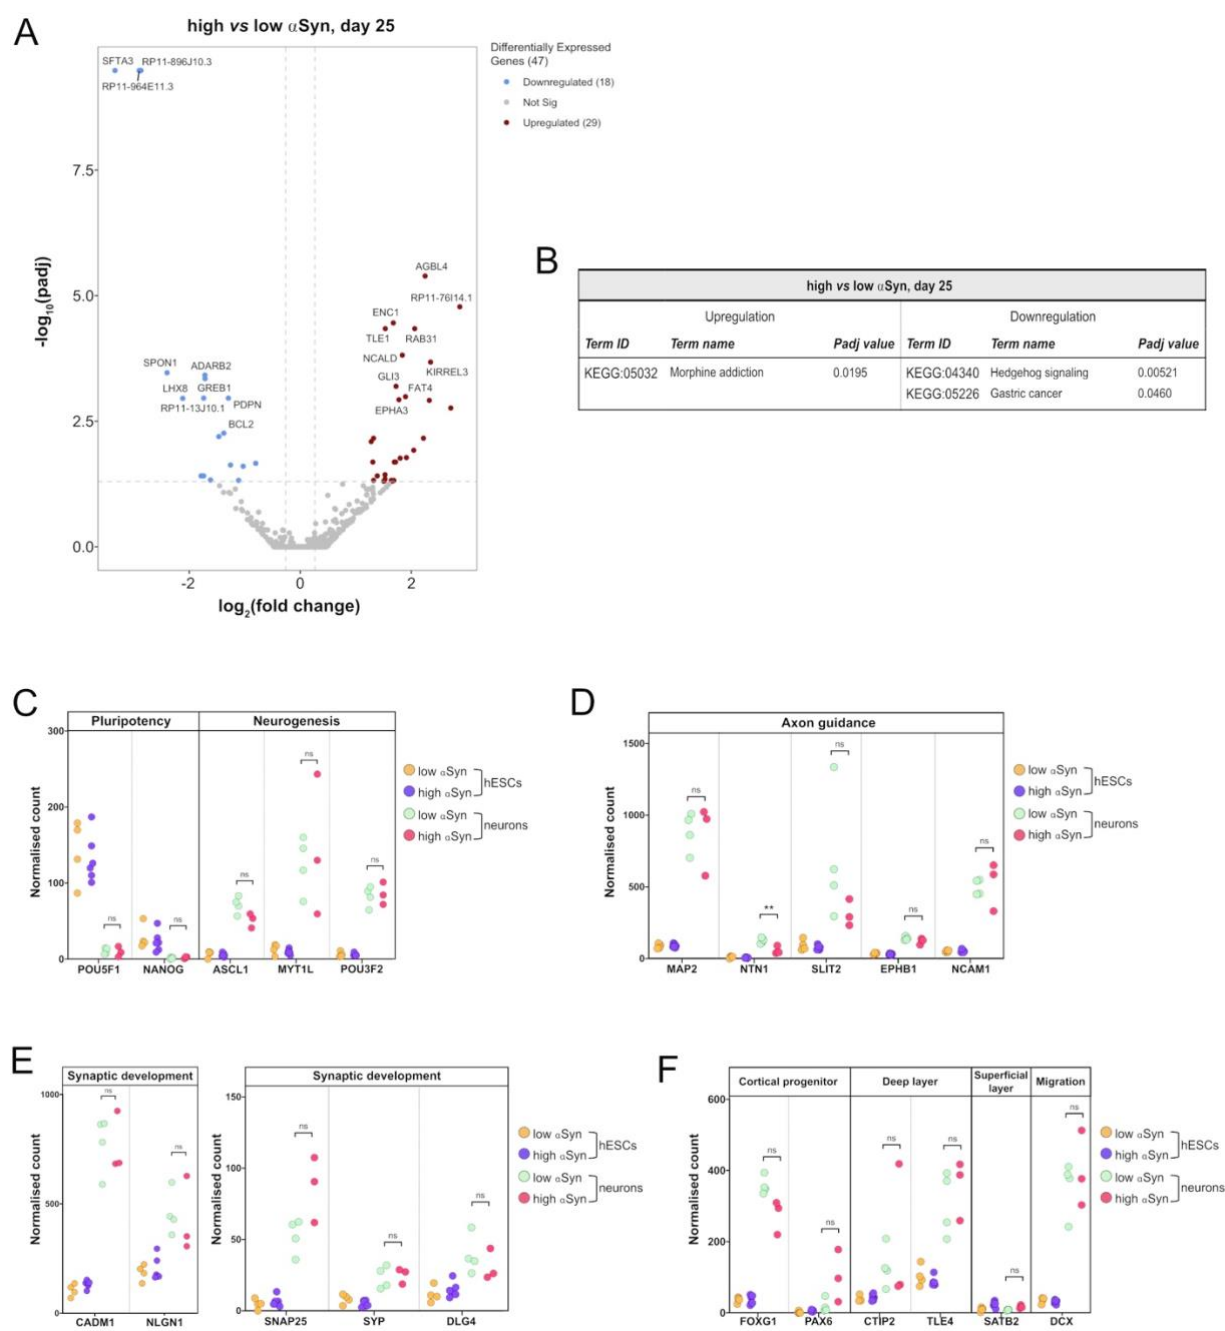

**Figure 7. RNA-seq analysis reveals that  $\alpha$ Syn overexpression does not have a significant impact on cortical marker gene expression.** (A) Volcano plot showing distribution of differentially expressed genes between high  $\alpha$ Syn and low  $\alpha$ Syn day 25 cortical neurons (B) Table showing all upregulated and downregulated KEGG terms for this comparison. (C-F) Plots showing normalised single gene read counts across all four sample groups for (C) pluripotency and neurogenesis markers, (D) axon guidance genes, (E) synaptic development genes, and (F) cortical progenitor, deep layer, superficial layer, and migration genes. Statistical comparisons between cortical neurons were performed using the Welch's t-test (\*\*  $p < 0.01$ ).

## References

- Abeliovich, A., Schmitz, Y., Fariñas, I., Choi-Lundberg, D., Ho, W.H., Castillo, P.E., Shinsky, N., Verdugo, J.M., Armanini, M., Ryan, A., Hynes, M., Phillips, H., Sulzer, D., Rosenthal, A., 2000. Mice lacking alpha-synuclein display functional deficits in the nigrostriatal dopamine system. *Neuron* 25, 239–252. doi:10.1016/s0896-6273(00)80886-7
- Al-Wandi, A., Ninkina, N., Millership, S., Williamson, S.J.M., Jones, P.A., Buchman, V.L., 2010. Absence of alpha-synuclein affects dopamine metabolism and synaptic markers in the striatum of aging mice. *Neurobiol. Aging* 31, 796–804. doi:10.1016/j.neurobiolaging.2008.11.001
- Anwar, S., Peters, O., Millership, S., Ninkina, N., Doig, N., Connor-Robson, N., Threlfell, S., Kooner, G., Deacon, R.M., Bannerman, D.M., Bolam, J.P., Chandra, S.S., Cragg, S.J., Wade-Martins, R., Buchman, V.L., 2011. Functional alterations to the nigrostriatal system in mice lacking all three members of the synuclein family. *J. Neurosci.* 31, 7264–7274. doi:10.1523/JNEUROSCI.6194-10.2011
- Borrell, V., Cárdenas, A., Ciceri, G., Galcerán, J., Flames, N., Pla, R., Nóbrega-Pereira, S., García-Frigola, C., Peregrín, S., Zhao, Z., Ma, L., Tessier-Lavigne, M., Marín, O., 2012. Slit/Robo signaling modulates the proliferation of central nervous system progenitors. *Neuron* 76, 338–352. doi:10.1016/j.neuron.2012.08.003
- Boulting, G.L., Kiskinis, E., Croft, G.F., Amoroso, M.W., Oakley, D.H., Wainger, B.J., Williams, D.J., Kahler, D.J., Yamaki, M., Davidow, L., Rodolfa, C.T., Dimos, J.T., Mikkilineni, S., MacDermott, A.B., Woolf, C.J., Henderson, C.E., Wichterle, H., Eggan, K., 2011. A functionally characterized test set of human induced pluripotent stem cells. *Nat. Biotechnol.* 29, 279–286. doi:10.1038/nbt.1783
- Brazdis, R.-M., Alecu, J.E., Marsch, D., Dahms, A., Simmnacher, K., Lörentz, S., Brendler, A., Schneider, Y., Marxreiter, F., Roybon, L., Winner, B., Xiang, W., Prots, I., 2020. Demonstration of brain region-specific neuronal vulnerability in human iPSC-based model of familial Parkinson's disease. *Hum. Mol. Genet.* 29, 1180–1191. doi:10.1093/hmg/ddaa039
- Brunskill, E.W., Witte, D.P., Shreiner, A.B., Potter, S.S., 1999. Characterization of npas3, a novel basic helix-loop-helix PAS gene expressed in the developing mouse nervous system. *Mech. Dev.* 88, 237–241. doi:10.1016/S0925-4773(99)00182-3
- Byers, B., Cord, B., Nguyen, H.N., Schüle, B., Fenno, L., Lee, P.C., Deisseroth, K., Langston, J.W., Pera, R.R., Palmer, T.D., 2011. SNCA triplication Parkinson's patient's iPSC-derived DA neurons accumulate  $\alpha$ -synuclein and are susceptible to oxidative stress. *PLoS One* 6, e26159. doi:10.1371/journal.pone.0026159
- Chambers, I., Colby, D., Robertson, M., Nichols, J., Lee, S., Tweedie, S., Smith, A., 2003. Functional expression cloning of Nanog, a pluripotency sustaining factor in embryonic stem cells. *Cell* 113, 643–655. doi:10.1016/s0092-8674(03)00392-1
- Chambers, S.M., Fasano, C.A., Papapetrou, E.P., Tomishima, M., Sadelain, M., Studer, L., 2009. Highly efficient neural conversion of human ES and iPS cells by dual inhibition of SMAD signaling. *Nat. Biotechnol.* 27, 275–280. doi:10.1038/nbt.1529
- Chartier-Harlin, M.-C., Kachergus, J., Roumier, C., Mouroux, V., Douay, X., Lincoln, S., Levecque, C., Larvor, L., Andrieux, J., Hulihan, M., Waucquier, N., Defebvre, L., Amouyel, P., Farrer, M., Destée, A., 2004. Alpha-synuclein locus duplication as a cause of familial Parkinson's disease. *Lancet* 364, 1167–1169. doi:10.1016/S0140-6736(04)17103-1
- Chen, L., Feng, P., Zhu, X., He, S., Duan, J., Zhou, D., 2016. Long non-coding RNA Malat1 promotes neurite outgrowth through activation of ERK/MAPK signalling pathway in N2a cells. *J. Cell Mol. Med.* 20, 2102–2110. doi:10.1111/jcmm.12904
- Chen, Y., Dolt, K.S., Kriek, M., Baker, T., Downey, P., Drummond, N.J., Canham, M.A., Natalwala, A., Rosser, S., Kunath, T., 2019. Engineering synucleinopathy-resistant human dopaminergic neurons by CRISPR-mediated deletion of the SNCA gene. *Eur. J. Neurosci.* 49, 510–524. doi:10.1111/ejn.14286
- Cho, K.O., Hunt, C.A., Kennedy, M.B., 1992. The rat brain postsynaptic density fraction contains a homolog of the Drosophila discs-large tumor suppressor protein. *Neuron* 9, 929–942. doi:10.1016/0896-6273(92)90245-9
- Connor-Robson, N., Peters, O.M., Millership, S., Ninkina, N., Buchman, V.L., 2016. Combinational losses of synucleins reveal their differential requirements for compensating age-dependent alterations in

- motor behavior and dopamine metabolism. *Neurobiol. Aging* 46, 107–112.  
doi:10.1016/j.neurobiolaging.2016.06.020
- Devine, M.J., Ryten, M., Vodicka, P., Thomson, A.J., Burdon, T., Houlden, H., Cavaleri, F., Nagano, M., Drummond, N.J., Taanman, J.-W., Schapira, A.H., Gwinn, K., Hardy, J., Lewis, P.A., Kunath, T., 2011. Parkinson's disease induced pluripotent stem cells with triplication of the  $\alpha$ -synuclein locus. *Nat. Commun.* 2, 440. doi:10.1038/ncomms1453
- Emani, M.R., Närvä, E., Stubb, A., Chakroborty, D., Viitala, M., Rokka, A., Rahkonen, N., Moulder, R., Denessiouk, K., Trokovic, R., Lund, R., Elo, L.L., Lahesmaa, R., 2015. The L1TD1 protein interactome reveals the importance of post-transcriptional regulation in human pluripotency. *Stem Cell Rep.* 4, 519–528. doi:10.1016/j.stemcr.2015.01.014
- Enriquez-Barreto, L., Palazzetti, C., Brennaman, L.H., Maness, P.F., Fairén, A., 2012. Neural cell adhesion molecule, NCAM, regulates thalamocortical axon pathfinding and the organization of the cortical somatosensory representation in mouse. *Front. Mol. Neurosci.* 5, 76. doi:10.3389/fnmol.2012.00076
- Flierl, A., Oliveira, L.M.A., Falomir-Lockhart, L.J., Mak, S.K., Hesley, J., Soldner, F., Arndt-Jovin, D.J., Jaenisch, R., Langston, J.W., Jovin, T.M., Schüle, B., 2014. Higher vulnerability and stress sensitivity of neuronal precursor cells carrying an alpha-synuclein gene triplication. *PLoS One* 9, e112413. doi:10.1371/journal.pone.0112413
- Gleeson, J.G., Lin, P.T., Flanagan, L.A., Walsh, C.A., 1999. Doublecortin is a microtubule-associated protein and is expressed widely by migrating neurons. *Neuron* 23, 257–271. doi:10.1016/s0896-6273(00)80778-3
- Greten-Harrison, B., Polydoro, M., Morimoto-Tomita, M., Diao, L., Williams, A.M., Nie, E.H., Makani, S., Tian, N., Castillo, P.E., Buchman, V.L., Chandra, S.S., 2010.  $\alpha\beta\gamma$ -Synuclein triple knockout mice reveal age-dependent neuronal dysfunction. *Proc. Natl. Acad. Sci. USA* 107, 19573–19578. doi:10.1073/pnas.1005005107
- Hardy, R.J., Loushin, C.L., Friedrich, V.L., Chen, Q., Ebersole, T.A., Lazzarini, R.A., Artzt, K., 1996. Neural cell type-specific expression of QKI proteins is altered in quakingviable mutant mice. *J. Neurosci.* 16, 7941–7949.
- Hitoshi, N., Ken-ichi, Y., Jun-ichi, M., 1991. Efficient selection for high-expression transfectants with a novel eukaryotic vector. *Gene* 108, 193–199. doi:10.1016/0378-1119(91)90434-D
- Hu, N., Strobl-Mazzulla, P., Sauka-Spengler, T., Bronner, M.E., 2012. DNA methyltransferase3A as a molecular switch mediating the neural tube-to-neural crest fate transition. *Genes Dev.* 26, 2380–2385. doi:10.1101/gad.198747.112
- Hussein, S.M., Batada, N.N., Vuoristo, S., Ching, R.W., Autio, R., Närvä, E., Ng, S., Sourour, M., Hämäläinen, R., Olsson, C., Lundin, K., Mikkola, M., Trokovic, R., Peitz, M., Brüstle, O., Bazett-Jones, D.P., Alitalo, K., Lahesmaa, R., Nagy, A., Otonkoski, T., 2011. Copy number variation and selection during reprogramming to pluripotency. *Nature* 471, 58–62. doi:10.1038/nature09871
- Ichtchenko, K., Hata, Y., Nguyen, T., Ullrich, B., Missler, M., Moomaw, C., Südhof, T.C., 1995. Neuroligin 1: a splice site-specific ligand for beta-neurexins. *Cell* 81, 435–443. doi:10.1016/0092-8674(95)90396-8
- Izant, J.G., McIntosh, J.R., 1980. Microtubule-associated proteins: a monoclonal antibody to MAP2 binds to differentiated neurons. *Proc. Natl. Acad. Sci. USA* 77, 4741–4745. doi:10.1073/pnas.77.8.4741
- Kennedy, T.E., Serafini, T., de la Torre, J.R., Tessier-Lavigne, M., 1994. Netrins are diffusible chemotropic factors for commissural axons in the embryonic spinal cord. *Cell* 78, 425–435. doi:10.1016/0092-8674(94)90421-9
- Liew, C.-G., Draper, J.S., Walsh, J., Moore, H., Andrews, P.W., 2007. Transient and stable transgene expression in human embryonic stem cells. *Stem Cells* 25, 1521–1528. doi:10.1634/stemcells.2006-0634
- Lin, L., Göke, J., Cukuroglu, E., Dranias, M.R., VanDongen, A.M.J., Stanton, L.W., 2016. Molecular Features Underlying Neurodegeneration Identified through In Vitro Modeling of Genetically Diverse Parkinson's Disease Patients. *Cell Rep.* 15, 2411–2426. doi:10.1016/j.celrep.2016.05.022
- Liu, J., Jones, K.L., Sumer, H., Verma, P.J., 2009. Stable transgene expression in human embryonic stem cells after simple chemical transfection. *Mol. Reprod. Dev.* 76, 580–586. doi:10.1002/mrd.20983
- Love, M.I., Huber, W., Anders, S., 2014. Moderated estimation of fold change and dispersion for RNA-seq data with DESeq2. *Genome Biol.* 15, 550–550. doi:10.1186/s13059-014-0550-8



- Madan, B., Madan, V., Weber, O., Tropel, P., Blum, C., Kieffer, E., Viville, S., Fehling, H.J., 2009. The pluripotency-associated gene *Dppa4* is dispensable for embryonic stem cell identity and germ cell development but essential for embryogenesis. *Mol. Cell. Biol.* 29, 3186–3203. doi:10.1128/MCB.01970-08
- Mariani, J., Simonini, M.V., Palejev, D., Tomasini, L., Coppola, G., Szekeley, A.M., Horvath, T.L., Vaccarino, F.M., 2012. Modeling human cortical development in vitro using induced pluripotent stem cells. *Proc. Natl. Acad. Sci. USA* 109, 12770–12775. doi:10.1073/pnas.1202944109
- Mayshar, Y., Ben-David, U., Lavon, N., Biancotti, J.-C., Yakir, B., Clark, A.T., Plath, K., Lowry, W.E., Benvenisty, N., 2010. Identification and classification of chromosomal aberrations in human induced pluripotent stem cells. *Cell Stem Cell* 7, 521–531. doi:10.1016/j.stem.2010.07.017
- Nichols, J., Zevnik, B., Anastassiadis, K., Niwa, H., Klewe-Nebenius, D., Chambers, I., Schöler, H., Smith, A., 1998. Formation of pluripotent stem cells in the mammalian embryo depends on the POU transcription factor Oct4. *Cell* 95, 379–391. doi:10.1016/s0092-8674(00)81769-9
- Oliveira, L.M.A., Falomir-Lockhart, L.J., Botelho, M.G., Lin, K.H., Wales, P., Koch, J.C., Gerhardt, E., Taschenberger, H., Outeiro, T.F., Lingor, P., Schüle, B., Arndt-Jovin, D.J., Jovin, T.M., 2015. Elevated  $\alpha$ -synuclein caused by SNCA gene triplication impairs neuronal differentiation and maturation in Parkinson's patient-derived induced pluripotent stem cells. *Cell Death Dis.* 6, e1994. doi:10.1038/cddis.2015.318
- Oyler, G.A., Higgins, G.A., Hart, R.A., Battenberg, E., Billingsley, M., Bloom, F.E., Wilson, M.C., 1989. The identification of a novel synaptosomal-associated protein, SNAP-25, differentially expressed by neuronal subpopulations. *J. Cell Biol.* 109, 3039–3052. doi:10.1083/jcb.109.6.3039
- Polymeropoulos, M.H., Lavedan, C., Leroy, E., Ide, S.E., Dehejia, A., Dutra, A., Pike, B., Root, H., Rubenstein, J., Boyer, R., Stenroos, E.S., Chandrasekharappa, S., Athanassiadou, A., Papapetropoulos, T., Johnson, W.G., Lazzarini, A.M., Duvoisin, R.C., Di Iorio, G., Golbe, L.I., Nussbaum, R.L., 1997. Mutation in the alpha-synuclein gene identified in families with Parkinson's disease. *Science* 276, 2045–2047. doi:10.1126/science.276.5321.2045
- Prots, I., Grosch, J., Brazdis, R.-M., Simmnacher, K., Veber, V., Havlicek, S., Hannappel, C., Krach, F., Krumbiegel, M., Schütz, O., Reis, A., Wrasidlo, W., Galasko, D.R., Groemer, T.W., Masliah, E., Schlötzer-Schrehardt, U., Xiang, W., Winkler, J., Winner, B., 2018.  $\alpha$ -Synuclein oligomers induce early axonal dysfunction in human iPSC-based models of synucleinopathies. *Proc. Natl. Acad. Sci. USA* 115, 7813–7818. doi:10.1073/pnas.1713129115
- Raciti, M., Granzotto, M., Duc, M.D., Fimiani, C., Cellot, G., Cherubini, E., Mallamaci, A., 2013. Reprogramming fibroblasts to neural-precursor-like cells by structured overexpression of pallial patterning genes. *Mol. Cell. Neurosci.* 57, 42–53. doi:10.1016/j.mcn.2013.10.004
- Radine, C., Peters, D., Reese, A., Neuwahl, J., Budach, W., Jänicke, R.U., Sohn, D., 2020. The RNA-binding protein RBM47 is a novel regulator of cell fate decisions by transcriptionally controlling the p53-p21-axis. *Cell Death Differ.* 27, 1274–1285. doi:10.1038/s41418-019-0414-6
- Raudvere, U., Kolberg, L., Kuzmin, I., Arak, T., Adler, P., Peterson, H., Vilo, J., 2019. g:Profiler: a web server for functional enrichment analysis and conversions of gene lists (2019 update). *Nucleic Acids Res.* 47, W191–W198. doi:10.1093/nar/gkz369
- Ross, O.A., Braithwaite, A.T., Skipper, L.M., Kachergus, J., Hulihan, M.M., Middleton, F.A., Nishioka, K., Fuchs, J., Gasser, T., Maraganore, D.M., Adler, C.H., Larvor, L., Chartier-Harlin, M.-C., Nilsson, C., Langston, J.W., Gwinn, K., Hattori, N., Farrer, M.J., 2008. Genomic investigation of alpha-synuclein multiplication and parkinsonism. *Ann. Neurol.* 63, 743–750. doi:10.1002/ana.21380
- Schneider, B.L., Seehus, C.R., Capowski, E.E., Aebischer, P., Zhang, S.-C., Svendsen, C.N., 2007. Overexpression of alpha-synuclein in human neural progenitors leads to specific changes in fate and differentiation. *Hum. Mol. Genet.* 16, 651–666. doi:10.1093/hmg/ddm008
- Shi, Y., Kirwan, P., Livesey, F.J., 2012. Directed differentiation of human pluripotent stem cells to cerebral cortex neurons and neural networks. *Nat. Protoc.* 7, 1836–1846. doi:10.1038/nprot.2012.116
- Singh Dolt, K., Hammachi, F., Kunath, T., 2017. Modeling Parkinson's disease with induced pluripotent stem cells harboring  $\alpha$ -synuclein mutations. *Brain Pathol.* 27, 545–551. doi:10.1111/bpa.12526
- Singleton, A.B., Farrer, M., Johnson, J., Singleton, A., Hague, S., Kachergus, J., Hulihan, M., Peuralinna, T., Dutra, A., Nussbaum, R., Lincoln, S., Crawley, A., Hanson, M., Maraganore, D., Adler, C., Cookson, M.R., Muentner, M., Baptista, M., Miller, D., Blancato, J., Hardy, J., Gwinn-Hardy, K.,

2003. alpha-Synuclein locus triplication causes Parkinson's disease. *Science* 302, 841.  
doi:10.1126/science.1090278
- Specht, C.G., Schoepfer, R., 2001. Deletion of the alpha-synuclein locus in a subpopulation of C57BL/6J inbred mice. *BMC Neurosci.* 2, 11. doi:10.1186/1471-2202-2-11
- Spillantini, M.G., Schmidt, M.L., Lee, V.M., Trojanowski, J.Q., Jakes, R., Goedert, M., 1997. Alpha-synuclein in Lewy bodies. *Nature* 388, 839–840. doi:10.1038/42166
- Stagi, M., Fogel, A.I., Biederer, T., 2010. SynCAM 1 participates in axo-dendritic contact assembly and shapes neuronal growth cones. *Proc. Natl. Acad. Sci. USA* 107, 7568–7573.  
doi:10.1073/pnas.0911798107
- Strehl, S., Glatt, K., Liu, Q.M., Glatt, H., Lalande, M., 1998. Characterization of two novel protocadherins (PCDH8 and PCDH9) localized on human chromosome 13 and mouse chromosome 14. *Genomics* 53, 81–89. doi:10.1006/geno.1998.5467
- Vallot, C., Huret, C., Lesecque, Y., Resch, A., Oudrhiri, N., Bennaceur-Griscelli, A., Duret, L., Rougeulle, C., 2013. XACT, a long noncoding transcript coating the active X chromosome in human pluripotent cells. *Nat. Genet.* 45, 239–241. doi:10.1038/ng.2530
- Vierbuchen, T., Ostermeier, A., Pang, Z.P., Kokubu, Y., Südhof, T.C., Wernig, M., 2010. Direct conversion of fibroblasts to functional neurons by defined factors. *Nature* 463, 1035–1041.  
doi:10.1038/nature08797
- Wiedenmann, B., Franke, W.W., 1985. Identification and localization of synaptophysin, an integral membrane glycoprotein of Mr 38,000 characteristic of presynaptic vesicles. *Cell* 41, 1017–1028.  
doi:10.1016/s0092-8674(85)80082-9
- Winner, B., Regensburger, M., Schreglmann, S., Boyer, L., Prots, I., Rockenstein, E., Mante, M., Zhao, C., Winkler, J., Masliah, E., Gage, F.H., 2012. Role of  $\alpha$ -synuclein in adult neurogenesis and neuronal maturation in the dentate gyrus. *J. Neurosci.* 32, 16906–16916. doi:10.1523/JNEUROSCI.2723-12.2012
- Wunderle, V.M., Critcher, R., Ashworth, A., Goodfellow, P.N., 1996. Cloning and characterization of SOX5, a new member of the human SOX gene family. *Genomics* 36, 354–358.  
doi:10.1006/geno.1996.0474
- Zasso, J., Ahmed, M., Cutarelli, A., Conti, L., 2018. Inducible Alpha-Synuclein Expression Affects Human Neural Stem Cells' Behavior. *Stem Cells Dev.* 27, 985–994. doi:10.1089/scd.2018.0011
